# Supplementary material for: Impact of long-term electrical stimulation of the lower leg muscles at home on gait speed in community-dwelling older adults
Source: Research Square preprint supplement (doi:10.21203/rs.3.rs-6586131/v1), 2025-06-03
Supplement: Supplementary file 1 [file 974b3aa492435758d35dc5e1.docx]

**Supplemental figure legends**

**Figure S1.** The center of gravity of the plantar foot during gait

The center of gravity of the plantar foot during gait was evaluated by shoes with force sensors embedded in the insole located on the big toe ball, small toe ball, and heel. The sensors can measure vertical ground reaction force at 0.02-second intervals. The center of gravity of the plantar foot is calculated from the force values of these three sensors and plotted as coordinates.
