# Supplementary material for: Impact of long-term electrical stimulation of the lower leg muscles at home on gait speed in community-dwelling older adults
Source: Research Square preprint supplement (doi:10.21203/rs.3.rs-6586131/v1), 2025-06-03
Supplement: Supplementary file 2 [file da3a6f2d2e5b1d284e43cb1e.docx]

**Table 1**. **Baseline profiles.**

| **Variables** |  | **Non-EMS** | **EMS** | **P value** |
| --- | --- | --- | --- | --- |
| n | 43 | 20 | 23 |  |
| Age (Year) | 80.0 [74.0 – 85.0] | 77.0 [71.5 – 85.0] | 80.0 [74.0 – 85.0] | 0.3525 |
| Gender (Female) | 33 (77%) | 16 (80%) | 17 (74%) | 0.9129 |
| Falls within the past 1 year | 15 (35%) | 7 (35%) | 8 (35%) | 0.7597 |
| SARC-F | 1.0 [0.0 – 2.0] | 1.0 [0.0 – 2.0] | 1.0 [0.0 – 2.0] | 0.8588 |
| MNA-SF | 13.0 [11.8 – 14.0] | 13.0 [12.3 – 13.8] | 13.0 [11.0 – 14.0] | 0.8685 |
| BMI | 23.2 [20.0 – 24.7] | 22.7 [21.2 – 23.8] | 23.2 [19.3 – 24.9] | 0.7862 |
| MV (kg) | 36.8 [33.0 – 41.4] | 36.4 [33.2 – 40.8] | 36.8 [33.3 – 49.7] | 0.9068 |
| CGS (m/sec) | 0.71 [0.57 – 0.86] | 0.71 [0.58 – 0.84] | 0.74 [0.57 – 0.89] | 0.4939 |
| SL (m) | 0.83 [0.65 – 1.00] | 0.86 [0.61 – 0.94] | 0.82 [0.65 – 1.0] | 0.9545 |
| GS (kg) | 18.5 [14.3 – 21.8] | 18.0 [12.0 – 20.5] | 19.0 [15.0 – 22.0] | 0.3300 |
| LLC (cm) | 33.0 [31.5 – 34.2] | 33.3 [30.8 – 34.1] | 33.0 [32.0 – 34.3] | 0.9595 |
| EMS enforcement days (Day) |  |  | 26.5 [26.0 – 27.8] |  |

All categorical variables were presented as n (%). Continuous variables are shown as median values and [interquartile ranges]. EMS: electrical muscle stimulation; SARC-F: a simple questionnaire to rapidly diagnose sarcopenia; MNA-SF: mini nutritional assessment-short form; BMI: body mass index; MV: muscle volume; CGS: comfortable gait speed; SL: stride length; GS: grip strength; LLC: lower leg circumference.
